# Supplementary material for: Mechanistic Study of Novel Dipeptidyl Peptidase IV Inhibitory Peptides from Goat’s Milk Based on Peptidomics and In Silico Analysis
Source: MDPI journal article supplement (doi:10.3390/foods13081194), 2024-04-14
Supplement: s1 [file s1]

## Supplementary Data

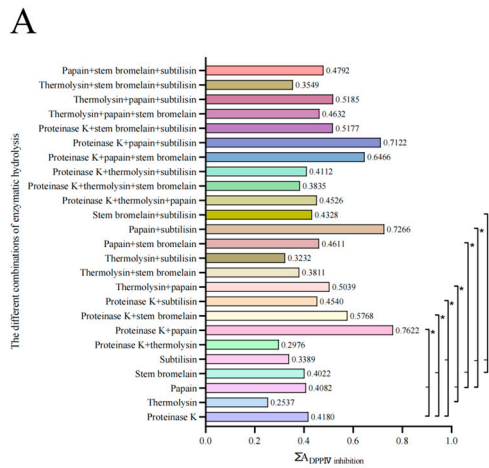

Figure S1. The total frequency of DPP-IV inhibitory peptides ( $\Sigma A_{DPP-IV}$  inhibition value) in goat casein and whey protein by *in silico* proteolysis using single enzymes or enzyme combinations. The \* represents significant differences among different enzyme combinations ( $p < 0.05$ ).

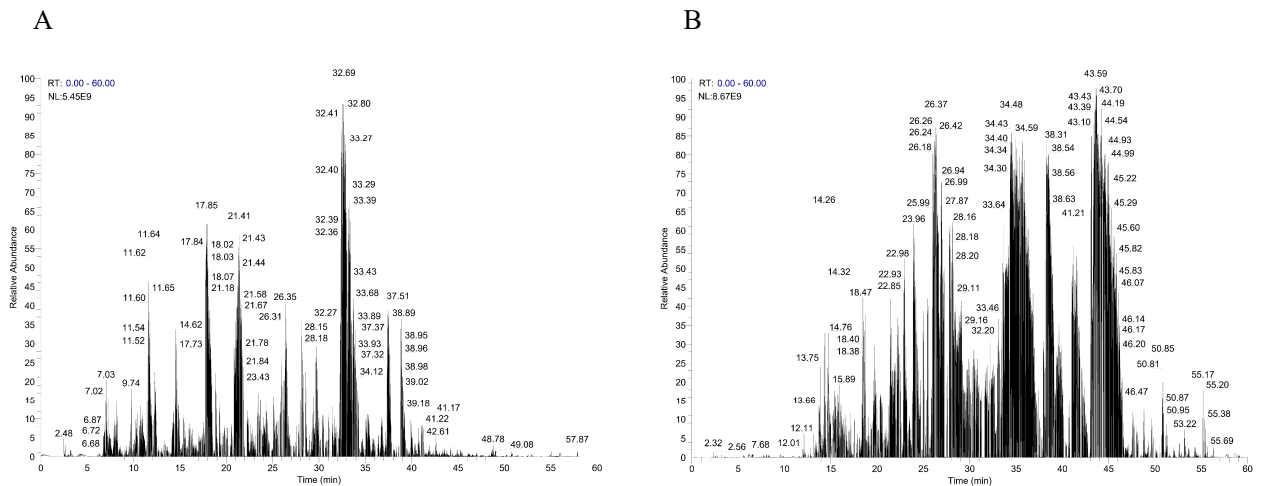

Figure S2. Basepeak plot obtained by LC-MS/MS for casein and whey protein in goat milk. A, basepeak plot of whey protein. B, basepeak plot of casein.

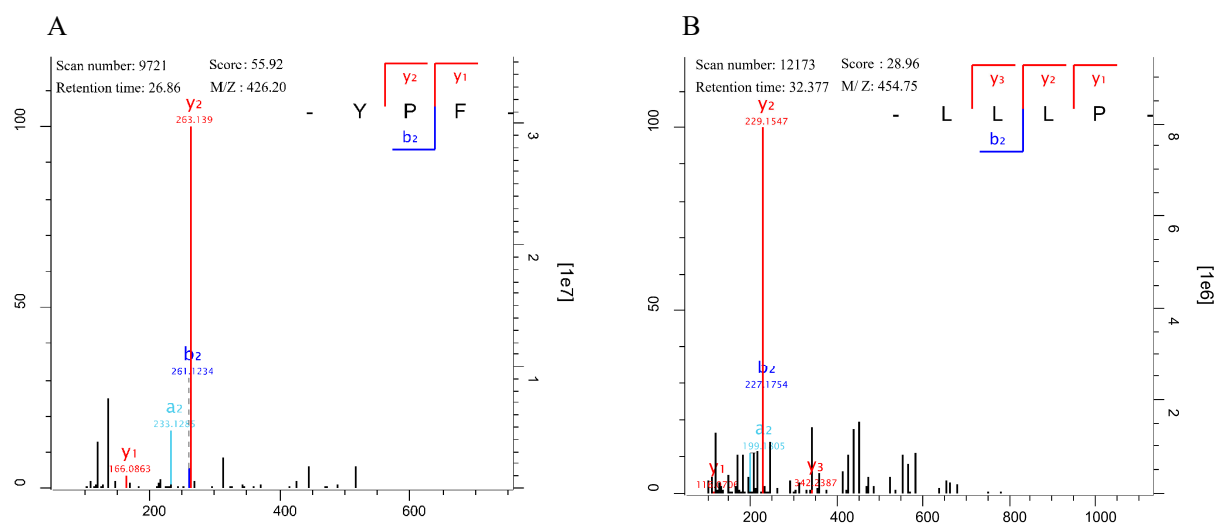

Figure S3. Mass spectrogram obtained by LC-MS/MS for YPF and LLLP in goat milk. A, mass spectrogram of YPF. B, mass spectrogram of LLLP.

Table S1 Source of identified peptides

| Number | Whey protein | Casein protein | Whey protein and casein protein |
|--------|--------------|----------------|---------------------------------|
| 1      | RVY          | YPF            | YPF                             |
| 2      | KYL          | WKK            | WKK                             |
| 3      | FLF          | YLY            | YLY                             |
| 4      | WLQ          | YLL            | YLL                             |
| 5      | VLW          | YLM            | YLM                             |
| 6      | VVW          | YVM            | YVM                             |
| 7      | NEW          | YVF            | YVF                             |
| 8      | LLW          | VLW            | VLW                             |
| 9      | YLF          | WYL            | WYL                             |
| 10     | LKF          | LFF            | LFF                             |
| 11     | LYL          | MLY            | MLY                             |
| 12     | YVF          | LSW            | LSW                             |
| 13     | VWF          | LEY            | LEY                             |
| 14     | WTL          | LLW            | LLW                             |
| 15     | KLF          | HPF            | HPF                             |
| 16     | LRL          | WSF            | WSF                             |
| 17     | WLE          | SWL            | SWL                             |
| 18     | YLL          | FFK            | FFK                             |
| 19     | WSL          | YAY            | YAY                             |
| 20     | WVY          | LQW            | LQW                             |
| 21     | LEY          | YQL            | EFR                             |
| 22     | LFW          | EFR            | LWV                             |
| 23     | WYL          | LWV            | TLW                             |
| 24     | LFF          | TLW            | FEL                             |
| 25     | FEL          | FEL            | VVW                             |
| 26     | FSW          | VVW            | EYL                             |
| 27     | FLQ          | EYL            | VFY                             |
| 28     | TLW          | VFY            | FLF                             |
| 29     | LWF          | FLF            | LWF                             |
| 30     | VWE          | WFK            | FLQ                             |
| 31     | YVY          | RLF            | LYQ                             |
| 32     | RWL          | LWF            | WTL                             |
| 33     | YVE          | FLQ            | KDF                             |
| 34     | LVW          | LYQ            | RFL                             |
| 35     | DYL          | WTL            | WLQ                             |
| 36     | EYL          | SWE            | HFL                             |
| 37     | YLY          | KDF            | VTW                             |
| 38     | KLY          | RFL            | LWK                             |
| 39     | VYW          | WLQ            | MFF                             |
| 40     | FVY          | HFL            | AFY                             |
| 41     | FLK          | YYV            | DYL                             |
| 42     | WKK          | VTW            | NLY                             |

| Number | Whey protein | Casein protein | Whey protein and casein protein |
|--------|--------------|----------------|---------------------------------|
| 43     | VEW          | LWK            | YTF                             |
| 44     | YRL          | WEV            | LLR                             |
| 45     | VFY          | MFF            | WLM                             |
| 46     | LFE          | AFY            | YYF                             |
| 47     | HFL          | DYL            | FEK                             |
| 48     | FFK          | YPY            | FVY                             |
| 49     | LSW          | NLY            | TWY                             |
| 50     | LLR          | NYY            | LEF                             |
| 51     | WDL          | YTF            | LFW                             |
| 52     | TWY          | LLR            | KLY                             |
| 53     | HPF          | WLM            | VEW                             |
| 54     | WLM          | TYF            | YSF                             |
| 55     | LTW          | YYF            | TFF                             |
| 56     | LEF          | WKP            | WAE                             |
| 57     | TFF          | FRY            | YLR                             |
| 58     | YLE          | FEK            | FLK                             |
| 59     | VTW          | FVY            | VWF                             |
| 60     | SWL          | TWY            | WVL                             |
| 61     | YPF          | LEF            | YVR                             |
| 62     | WRQ          | TWL            | YWL                             |
| 63     | YSF          | LFW            | WVY                             |
| 64     | YVQ          | WAY            | RWL                             |
| 65     | WVL          | FLE            | VWY                             |
| 66     | AWY          | KLY            | QVY                             |
| 67     | PFR          | VEW            | LRL                             |
| 68     | WQL          | YSF            | FKF                             |
| 69     | FDF          | TFF            | LHY                             |
| 70     | YHR          | WAE            | YFS                             |
| 71     | QDF          | YLR            | FTR                             |
| 72     | LYQ          | WYA            | HYL                             |
| 73     | YAY          | FLK            | YLK                             |
| 74     | YLK          | VWF            | MEY                             |
| 75     | LHY          | SYF            | YLE                             |
| 76     | RLQ          | WVL            | SKW                             |
| 77     | KDF          | YVR            | YVE                             |
| 78     | RFL          | YWL            | YRL                             |
| 79     | LHW          | WVY            | RSF                             |
| 80     | MFF          | RWL            | NEW                             |
| 81     | NFF          | KEY            | FNQ                             |
| 82     | TFW          | VWY            | YYK                             |
| 83     | LQW          | QVY            | QFE                             |
| 84     | YTF          | FEY            | WAH                             |
| 85     | HYL          | RDW            | REL                             |

| Number | Whey protein | Casein protein | Whey protein and casein protein |
|--------|--------------|----------------|---------------------------------|
| 86     | TQW          | LNK            | YVH                             |
| 87     | SKW          | LRL            | FDQ                             |
| 88     | WRK          | FKF            | WLH                             |
| 89     | FEK          | LHY            | RVY                             |
| 90     | SEW          | YRY            | YHT                             |
| 91     | VMY          | WSR            | FYK                             |
| 92     | ELF          | NWT            | HER                             |
| 93     | YHL          | YFS            | VYPF                            |
| 94     | RFQ          | LYR            | VPPF                            |
| 95     | WLD          | FYA            | YLPL                            |
| 96     | YYF          | FTR            | VTVL                            |
| 97     | WFT          | HYL            | TLVF                            |
| 98     | LWV          | YLK            | TLLA                            |
| 99     | VWY          | MEY            | PEVL                            |
| 100    | LWK          | YLE            | TSVL                            |
| 101    | WTQ          | SKW            | LLPL                            |
| 102    | MWL          | YVE            | PAAF                            |
| 103    | EFR          | YRL            | TLTL                            |
| 104    | MLY          | YYH            | VTTL                            |
| 105    | MSW          | RSF            | YVLA                            |
| 106    | RAW          | NEW            | VTPQ                            |
| 107    | YYK          | FNQ            | YVYP                            |
| 108    | RSF          | YHV            | QLPE                            |
| 109    | WLH          | YYK            | VTEL                            |
| 110    | QVY          | QFE            | TLAL                            |
| 111    | KMF          | WAH            | LLLL                            |
| 112    | LYK          | REL            | TDVL                            |
| 113    | VWK          | YVH            | LFSL                            |
| 114    | EFM          | FDQ            | TPVV                            |
| 115    | TTW          | WLH            | VTLY                            |
| 116    | FWV          | RVY            | LLLP                            |
| 117    | YWL          | YHT            | VSVL                            |
| 118    | YHF          | FYK            | VKPE                            |
| 119    | FNQ          | HER            | VTLV                            |
| 120    | PWL          | VYPF           | YVVT                            |
| 121    | LRQ          | VPPF           | VLLK                            |
| 122    | YLD          | FTVP           | LLTV                            |
| 123    | YFS          | YLPL           | VLTV                            |
| 124    | WAE          | FPPQ           | VPVQ                            |
| 125    | FKF          | VTVL           | TLLL                            |
| 126    | AFY          | TLVF           | VATL                            |
| 127    | VYR          | TLLA           | VTLF                            |
| 128    | MHF          | PEVL           | YLAV                            |

| Number | Whey protein | Casein protein | Whey protein and casein protein |
|--------|--------------|----------------|---------------------------------|
| 129    | NLY          | TSVL           | FEVS                            |
| 130    | EDF          | LLPL           | LLKL                            |
| 131    | YLM          | PAYT           | VTLQ                            |
| 132    | QFE          | PAAF           | VTAF                            |
| 133    | YLR          | TLTL           | YTTL                            |
| 134    | QFF          | VTTL           | TLTV                            |
| 135    | WAQ          | YVLA           | TLLT                            |
| 136    | RMF          | VTPQ           | SLTF                            |
| 137    | TPW          | TDVE           | RHVP                            |
| 138    | HER          | YVYP           | TPTK                            |
| 139    | YWS          | QLPE           | YVLT                            |
| 140    | FYK          | TLDV           | GEDF                            |
| 141    | KFH          | VTEL           | SKLL                            |
| 142    | FQF          | TLAL           | LEPL                            |
| 143    | RDF          | LLLL           | FEVQ                            |
| 144    | LEW          | TDVL           | VTVQ                            |
| 145    | YVH          | LFSL           | VLLT                            |
| 146    | QPY          | TPVV           | YESL                            |
| 147    | YTM          | VTLY           | SFAL                            |
| 148    | YVR          | VTAL           | TLAV                            |
| 149    | YVM          | LEYS           | VFTV                            |
| 150    | QQF          | LLLP           | VLVE                            |
| 151    | EEF          | VSVL           | LELA                            |
| 152    | TVW          | VKPE           | VELY                            |
| 153    | YRV          | VTLV           | YVLL                            |
| 154    | FTR          | YVVT           | YTLV                            |
| 155    | WKE          | TQDT           | VTEF                            |
| 156    | RRH          | VLLK           | VTKE                            |
| 157    | RRQ          | LLTV           | VTLP                            |
| 158    | RHN          | ATSY           | NETV                            |
| 159    | FDQ          | LLLG           | LATF                            |
| 160    | HFT          | VLTV           | YVVE                            |
| 161    | REL          | VPVQ           | LLVT                            |
| 162    | TDW          | TLLL           | LAVQ                            |
| 163    | WTN          | VATL           | PEVK                            |
| 164    | YHT          | VTLF           | VTKP                            |
| 165    | MEY          | FYPD           | VPSK                            |
| 166    | RFK          | YLAV           | LELF                            |
| 167    | EFH          | VFVG           | VGAW                            |
| 168    | YLQ          | FEVS           | GELF                            |
| 169    | THW          | LLKL           | LEGF                            |
| 170    | QFQ          | VTLQ           | LEVT                            |
| 171    | RQT          | VTAF           | LKLE                            |

| Number | Whey protein | Casein protein | Whey protein and casein protein |
|--------|--------------|----------------|---------------------------------|
| 172    | WAH          | LPAF           | VLDL                            |
| 173    | WSF          | YTTL           | LPPL                            |
| 174    | QFH          | TLTV           | VSTL                            |
| 175    | VTDL         | TLLT           | TLSW                            |
| 176    | VYPF         | LYVP           | VTDL                            |
| 177    | LFSL         | HLSW           | TAYV                            |
| 178    | VESL         | SLTF           | TPPL                            |
| 179    | VVVL         | RHVP           | VKVL                            |
| 180    | VPPF         | PDPV           | VFLN                            |
| 181    | VTVQ         | PLLV           | VGQL                            |
| 182    | VTPQ         | TPTK           | VNVK                            |
| 183    | TLLA         | YVLT           | YLVA                            |
| 184    | VPVQ         | GEDF           | FALE                            |
| 185    | LLTV         | SKLL           | TLQA                            |
| 186    | LHLR         | LEPL           | TLSL                            |
| 187    | VTTL         | FEVQ           | VEVF                            |
| 188    | VELL         | VTVQ           | VELV                            |
| 189    | SPPL         | VLLT           | TLKL                            |
| 190    | WVEA         | YESL           | YSLQ                            |
| 191    | LLVQ         | SFAL           | VLEP                            |
| 192    | VEFA         | TLAV           | NSLL                            |
| 193    | QLPE         | VFTV           | SKKA                            |
| 194    | LLLL         | VLVE           | LEVA                            |
| 195    | TLTL         | VHVL           | TTAE                            |
| 196    | YLAV         | TSLM           | LLEA                            |
| 197    | LELY         | LELA           | VEPF                            |
| 198    | TPPL         | VELY           | VTLK                            |
| 199    | LLKQ         | YVLL           | VTSV                            |
| 200    | VQLV         | YTLV           | LAVE                            |
| 201    | NFPA         | VTEF           | LEGH                            |
| 202    | VTVL         | VSLV           | NFPA                            |
| 203    | YLPL         | VTKE           | LHLR                            |
| 204    | TLVF         | VTLP           | VALK                            |
| 205    | TPTK         | YSVS           | VELK                            |
| 206    | PLLL         | NETV           | FEAL                            |
| 207    | TLTV         | YEVN           | TPPK                            |
| 208    | WLGL         | LATF           | LKLS                            |
| 209    | VTSL         | YVVE           | TLVE                            |
| 210    | VQVA         | LLVT           | VEFA                            |
| 211    | LELF         | LRLF           | PPLE                            |
| 212    | VEFL         | LAVQ           | SSVF                            |
| 213    | VTSV         | PEVK           | FFTK                            |
| 214    | VAPF         | VTKP           | EDLQ                            |

| Number | Whey protein | Casein protein | Whey protein and casein protein |
|--------|--------------|----------------|---------------------------------|
| 215    | TLLT         | MLYQ           | VQNL                            |
| 216    | LLAN         | VELQ           | ELYK                            |
| 217    | LLTL         | VPSK           | VGLD                            |
| 218    | YVLL         | LELF           | PGKL                            |
| 219    | LLKL         | LDVE           | SSKV                            |
| 220    | VLTV         | VGAW           | VTPE                            |
| 221    | VGQL         | PFPT           | VVPQ                            |
| 222    | LEVL         | GELF           | VDVT                            |
| 223    | FELL         | LMLQ           | FAAE                            |
| 224    | THKV         | PFSP           | TKEP                            |
| 225    | VPDL         | VLPL           | VEEE                            |
| 226    | TLNL         | LEGF           | KLLA                            |
| 227    | FEVS         | LEVT           | LAVR                            |
| 228    | VETD         | LKLE           | SNVL                            |
| 229    | TEVE         | VLDL           | SSTF                            |
| 230    | LELK         | LPPL           | YTGE                            |
| 231    | TLVE         | VSTL           | VTTE                            |
| 232    | SDLL         | VPVT           | TDLA                            |
| 233    | VEVL         | TLSW           | PGLK                            |
| 234    | VTLV         | VTDL           | VASE                            |
| 235    | VEVT         | GQPK           | LLTS                            |
| 236    | MELL         | TAYV           | MFPPQ                           |
| 237    | YSLL         | TPPL           | TPVVV                           |
| 238    | YTLL         | VKVL           | PAALE                           |
| 239    | TLLL         | VFLN           | KEMPFK                          |
| 240    | VLVE         | VGQL           | LPAPIVR                         |
| 241    | LKLS         | VNVK           | RGPFILV                         |
| 242    | WLVL         | YLVA           | TEEEKNRLN                       |
| 243    | VTLQ         | PPQP           | VEELKPTPEGN                     |
| 244    | LAVE         | APAY           | GLSPEVPNENLLR                   |
| 245    | LELA         | PKPA           | ELKPTPEGNLEIL                   |
| 246    | LLEA         | FALE           | -                               |
| 247    | LLVR         | HFLY           | -                               |
| 248    | VAKL         | TLQA           | -                               |
| 249    | TSVL         | TLSL           | -                               |
| 250    | WLVK         | PEPE           | -                               |
| 251    | VTLF         | PKVL           | -                               |
| 252    | VLLT         | VEVF           | -                               |
| 253    | VTTW         | VELV           | -                               |
| 254    | LEVT         | TLVD           | -                               |
| 255    | TKPL         | TLKL           | -                               |
| 256    | RLLK         | YSLQ           | -                               |
| 257    | VTEF         | VMLY           | -                               |



| Number | Whey protein | Casein protein | Whey protein and casein protein |
|--------|--------------|----------------|---------------------------------|
| 258    | VTEL         | VLEP           | -                               |
| 259    | TGLL         | SSTK           | -                               |
| 260    | VVEQ         | VPLL           | -                               |
| 261    | VVVK         | FHVM           | -                               |
| 262    | PEAL         | NSLL           | -                               |
| 263    | FRPD         | SKKA           | -                               |
| 264    | LLKV         | VFVN           | -                               |
| 265    | KCSS         | LEVA           | -                               |
| 266    | TGLE         | TETL           | -                               |
| 267    | EALL         | PLAD           | -                               |
| 268    | TLSL         | PLDL           | -                               |
| 269    | LFVL         | TTAE           | -                               |
| 270    | HLPL         | LLEA           | -                               |
| 271    | VTPE         | VEPF           | -                               |
| 272    | VLLK         | VTLK           | -                               |
| 273    | PFVT         | VTSV           | -                               |
| 274    | VTAE         | LAVE           | -                               |
| 275    | KLLA         | LEGH           | -                               |
| 276    | LKLE         | TQPL           | -                               |
| 277    | PEVL         | NFPA           | -                               |
| 278    | VTKV         | TESF           | -                               |
| 279    | LEPL         | LHLR           | -                               |
| 280    | LPPL         | VALK           | -                               |
| 281    | ELLK         | VELK           | -                               |
| 282    | LAVT         | FEAL           | -                               |
| 283    | NELQ         | TPPK           | -                               |
| 284    | QPPK         | LKLS           | -                               |
| 285    | VTDW         | SPFQ           | -                               |
| 286    | EAVF         | TLVE           | -                               |
| 287    | LLKD         | VEFA           | -                               |
| 288    | VEVQ         | PPLE           | -                               |
| 289    | SLTF         | SSVF           | -                               |
| 290    | FPEV         | FFTK           | -                               |
| 291    | KGWS         | EDLQ           | -                               |
| 292    | YLLK         | PKCQ           | -                               |
| 293    | LEVA         | VQNL           | -                               |
| 294    | LLVT         | ELYK           | -                               |
| 295    | TDLL         | VGLD           | -                               |
| 296    | QFPF         | VPYY           | -                               |
| 297    | VSPL         | PGKL           | -                               |
| 298    | PPGR         | VTEA           | -                               |
| 299    | VTLP         | SSKV           | -                               |
| 300    | LLLQ         | VTPE           | -                               |

| Number | Whey protein | Casein protein | Whey protein and casein protein |
|--------|--------------|----------------|---------------------------------|
| 301    | FEFL         | VVPQ           | -                               |
| 302    | VDPL         | VDVT           | -                               |
| 303    | VFAE         | FAAE           | -                               |
| 304    | VLNL         | TKEP           | -                               |
| 305    | YSLQ         | VEEE           | -                               |
| 306    | SSLL         | KLLA           | -                               |
| 307    | VQLS         | LAVR           | -                               |
| 308    | SFLE         | VPSR           | -                               |
| 309    | VHKL         | SNVL           | -                               |
| 310    | YRVY         | SSTF           | -                               |
| 311    | VPSK         | YTGE           | -                               |
| 312    | LLAE         | VTTE           | -                               |
| 313    | VTAF         | TDLA           | -                               |
| 314    | PLVR         | PGLK           | -                               |
| 315    | PAAF         | VASE           | -                               |
| 316    | VEVF         | LLTS           | -                               |
| 317    | YESL         | MFPPQ          | -                               |
| 318    | VVLE         | MPFPK          | -                               |
| 319    | VRLQ         | TPVVV          | -                               |
| 320    | VLDL         | VDVPF          | -                               |
| 321    | EDLQ         | PAALE          | -                               |
| 322    | LKLK         | KEMPPFK        | -                               |
| 323    | VVTL         | LPAPIVR        | -                               |
| 324    | VEGL         | TPVVVPPF       | -                               |
| 325    | YVVA         | RGFPILV        | -                               |
| 326    | TLAV         | EEKNRLN        | -                               |
| 327    | PLVL         | TEDELQDK       | -                               |
| 328    | YVYP         | TEEKNRLN       | -                               |
| 329    | VVTF         | HPHPLSFM       | -                               |
| 330    | VDPP         | VASLLGLSL      | -                               |
| 331    | VKLD         | SPEVPNENLL     | -                               |
| 332    | TSQL         | EKDERFFDDK     | -                               |
| 333    | FDVD         | SPEVPNENLLR    | -                               |
| 334    | TLDP         | MNKLLSPIVPQ    | -                               |
| 335    | TKLL         | FSDIPNPIGSE    | -                               |
| 336    | VNFL         | VEELKPTPEGN    | -                               |
| 337    | VDVT         | KDERFFDDKIA    | -                               |
| 338    | EELL         | KPTPEGNLEIL    | -                               |
| 339    | SKLL         | EMPPFKYPVEPF   | -                               |
| 340    | YAVA         | TPVVVPPFLQPE   | -                               |
| 341    | QKLL         | TEDELQDKIHPF   | -                               |
| 342    | TLAL         | LSPEVPNENLLR   | -                               |
| 343    | YVLA         | PTVVVEDLRLCT   | -                               |

| Number | Whey protein | Casein protein | Whey protein and casein protein |
|--------|--------------|----------------|---------------------------------|
| 344    | RGQF         | SLSQPKVLPVPQ   | -                               |
| 345    | LHSL         | PILVTPSLDPLQ   | -                               |
| 346    | TDVL         | GLSPEVPNENLLR  | -                               |
| 347    | VGAW         | KEMPFPKYPVEPF  | -                               |
| 348    | REDF         | ELKPTPEGNLEIL  | -                               |
| 349    | TLVY         | HKEMPFPKYPVEPF | -                               |
| 350    | VAFN         | -              | -                               |
| 351    | TTSL         | -              | -                               |
| 352    | VELY         | -              | -                               |
| 353    | TLKL         | -              | -                               |
| 354    | VKVL         | -              | -                               |
| 355    | VALE         | -              | -                               |
| 356    | GELF         | -              | -                               |
| 357    | VTLY         | -              | -                               |
| 358    | VQNL         | -              | -                               |
| 359    | FAAE         | -              | -                               |
| 360    | LEVS         | -              | -                               |
| 361    | VFTV         | -              | -                               |
| 362    | VTVE         | -              | -                               |
| 363    | TEVK         | -              | -                               |
| 364    | WLTl         | -              | -                               |
| 365    | VATL         | -              | -                               |
| 366    | KRVL         | -              | -                               |
| 367    | YPSP         | -              | -                               |
| 368    | PEVK         | -              | -                               |
| 369    | LLPL         | -              | -                               |
| 370    | VMLL         | -              | -                               |
| 371    | VLAw         | -              | -                               |
| 372    | GFDL         | -              | -                               |
| 373    | TSLF         | -              | -                               |
| 374    | VAVL         | -              | -                               |
| 375    | FEAL         | -              | -                               |
| 376    | TDLA         | -              | -                               |
| 377    | TLSW         | -              | -                               |
| 378    | YEFK         | -              | -                               |
| 379    | VALL         | -              | -                               |
| 380    | YLLE         | -              | -                               |
| 381    | LFSE         | -              | -                               |
| 382    | SSML         | -              | -                               |
| 383    | LSDD         | -              | -                               |
| 384    | GEDF         | -              | -                               |
| 385    | VSVL         | -              | -                               |
| 386    | VELV         | -              | -                               |

| Number | Whey protein | Casein protein | Whey protein and casein protein |
|--------|--------------|----------------|---------------------------------|
| 387    | PFAQ         | -              | -                               |
| 388    | AYLK         | -              | -                               |
| 389    | FFTK         | -              | -                               |
| 390    | MKVL         | -              | -                               |
| 391    | YVVE         | -              | -                               |
| 392    | VTKP         | -              | -                               |
| 393    | VALK         | -              | -                               |
| 394    | TPVV         | -              | -                               |
| 395    | PAYV         | -              | -                               |
| 396    | VKSP         | -              | -                               |
| 397    | TLLW         | -              | -                               |
| 398    | RSKC         | -              | -                               |
| 399    | VTVN         | -              | -                               |
| 400    | VEPF         | -              | -                               |
| 401    | VKAE         | -              | -                               |
| 402    | KAYS         | -              | -                               |
| 403    | VLSL         | -              | -                               |
| 404    | SPLL         | -              | -                               |
| 405    | LETK         | -              | -                               |
| 406    | PFVL         | -              | -                               |
| 407    | VVPK         | -              | -                               |
| 408    | YTLV         | -              | -                               |
| 409    | YSAE         | -              | -                               |
| 410    | SFAL         | -              | -                               |
| 411    | LEKG         | -              | -                               |
| 412    | LLSA         | -              | -                               |
| 413    | LLTS         | -              | -                               |
| 414    | QALL         | -              | -                               |
| 415    | VTWD         | -              | -                               |
| 416    | LQQN         | -              | -                               |
| 417    | YVLT         | -              | -                               |
| 418    | LAVR         | -              | -                               |
| 419    | DFGL         | -              | -                               |
| 420    | SSVF         | -              | -                               |
| 421    | SPVL         | -              | -                               |
| 422    | VEPL         | -              | -                               |
| 423    | SSQL         | -              | -                               |
| 424    | VFTQ         | -              | -                               |
| 425    | LEGF         | -              | -                               |
| 426    | VTLK         | -              | -                               |
| 427    | FALE         | -              | -                               |
| 428    | TWAR         | -              | -                               |
| 429    | TFLE         | -              | -                               |

| Number | Whey protein | Casein protein | Whey protein and casein protein |
|--------|--------------|----------------|---------------------------------|
| 430    | VPKP         | -              | -                               |
| 431    | VQWL         | -              | -                               |
| 432    | TLMC         | -              | -                               |
| 433    | VVPQ         | -              | -                               |
| 434    | FAVP         | -              | -                               |
| 435    | TPPK         | -              | -                               |
| 436    | SNVL         | -              | -                               |
| 437    | AKLL         | -              | -                               |
| 438    | LFKV         | -              | -                               |
| 439    | VTWQ         | -              | -                               |
| 440    | VELK         | -              | -                               |
| 441    | FALT         | -              | -                               |
| 442    | QLKF         | -              | -                               |
| 443    | EAPF         | -              | -                               |
| 444    | PALF         | -              | -                               |
| 445    | YTTL         | -              | -                               |
| 446    | PEKV         | -              | -                               |
| 447    | VTTE         | -              | -                               |
| 448    | ELYK         | -              | -                               |
| 449    | SDVF         | -              | -                               |
| 450    | YVVT         | -              | -                               |
| 451    | VEEE         | -              | -                               |
| 452    | LRPL         | -              | -                               |
| 453    | NVTV         | -              | -                               |
| 454    | SSYT         | -              | -                               |
| 455    | VLEP         | -              | -                               |
| 456    | PKPK         | -              | -                               |
| 457    | VTLH         | -              | -                               |
| 458    | NSLL         | -              | -                               |
| 459    | TKEP         | -              | -                               |
| 460    | LATF         | -              | -                               |
| 461    | VLVS         | -              | -                               |
| 462    | VAVR         | -              | -                               |
| 463    | RHVP         | -              | -                               |
| 464    | LAVQ         | -              | -                               |
| 465    | TPEP         | -              | -                               |
| 466    | VTLT         | -              | -                               |
| 467    | FDVW         | -              | -                               |
| 468    | VASE         | -              | -                               |
| 469    | LLLP         | -              | -                               |
| 470    | VSTL         | -              | -                               |
| 471    | LEYQ         | -              | -                               |
| 472    | QKGW         | -              | -                               |

| Number | Whey protein | Casein protein | Whey protein and casein protein |
|--------|--------------|----------------|---------------------------------|
| 473    | YTGE         | -              | -                               |
| 474    | YGTD         | -              | -                               |
| 475    | FEVQ         | -              | -                               |
| 476    | RFVS         | -              | -                               |
| 477    | LKEY         | -              | -                               |
| 478    | VGLD         | -              | -                               |
| 479    | LAWL         | -              | -                               |
| 480    | YVHE         | -              | -                               |
| 481    | SRTT         | -              | -                               |
| 482    | HKVT         | -              | -                               |
| 483    | QNLE         | -              | -                               |
| 484    | VPLK         | -              | -                               |
| 485    | RPAE         | -              | -                               |
| 486    | VFLN         | -              | -                               |
| 487    | TLLK         | -              | -                               |
| 488    | KAVF         | -              | -                               |
| 489    | PPLE         | -              | -                               |
| 490    | VGTY         | -              | -                               |
| 491    | TLKW         | -              | -                               |
| 492    | YLVA         | -              | -                               |
| 493    | VMLE         | -              | -                               |
| 494    | AAQL         | -              | -                               |
| 495    | EPYA         | -              | -                               |
| 496    | YAVK         | -              | -                               |
| 497    | FDTD         | -              | -                               |
| 498    | TEPP         | -              | -                               |
| 499    | TKPE         | -              | -                               |
| 500    | PNLV         | -              | -                               |
| 501    | VEDE         | -              | -                               |
| 502    | PGKL         | -              | -                               |
| 503    | RLAW         | -              | -                               |
| 504    | GDTY         | -              | -                               |
| 505    | EAPT         | -              | -                               |
| 506    | LKPP         | -              | -                               |
| 507    | PEFH         | -              | -                               |
| 508    | LETE         | -              | -                               |
| 509    | LLRA         | -              | -                               |
| 510    | NYVV         | -              | -                               |
| 511    | HEAL         | -              | -                               |
| 512    | PGWL         | -              | -                               |
| 513    | VKPE         | -              | -                               |
| 514    | TTVT         | -              | -                               |
| 515    | TAYV         | -              | -                               |

| Number | Whey protein | Casein protein | Whey protein and casein protein |
|--------|--------------|----------------|---------------------------------|
| 516    | NETV         | -              | -                               |
| 517    | LLSK         | -              | -                               |
| 518    | VERR         | -              | -                               |
| 519    | EDVS         | -              | -                               |
| 520    | PGLK         | -              | -                               |
| 521    | VNVK         | -              | -                               |
| 522    | VTTK         | -              | -                               |
| 523    | TTAE         | -              | -                               |
| 524    | VRKQ         | -              | -                               |
| 525    | LHTS         | -              | -                               |
| 526    | SSTF         | -              | -                               |
| 527    | KGTE         | -              | -                               |
| 528    | SKKA         | -              | -                               |
| 529    | PLPP         | -              | -                               |
| 530    | SSVR         | -              | -                               |
| 531    | VAKF         | -              | -                               |
| 532    | LRVK         | -              | -                               |
| 533    | LDHA         | -              | -                               |
| 534    | VTSK         | -              | -                               |
| 535    | YVYK         | -              | -                               |
| 536    | TLQA         | -              | -                               |
| 537    | EPVL         | -              | -                               |
| 538    | VAWF         | -              | -                               |
| 539    | RQGG         | -              | -                               |
| 540    | LEGH         | -              | -                               |
| 541    | LVAK         | -              | -                               |
| 542    | LVRQ         | -              | -                               |
| 543    | NVRF         | -              | -                               |
| 544    | VTKE         | -              | -                               |
| 545    | VETH         | -              | -                               |
| 546    | SSKV         | -              | -                               |
| 547    | VELSN        | -              | -                               |
| 548    | MFPPQ        | -              | -                               |
| 549    | TLLTV        | -              | -                               |
| 550    | VEGLE        | -              | -                               |
| 551    | TPVVV        | -              | -                               |
| 552    | THKLE        | -              | -                               |
| 553    | PAALE        | -              | -                               |
| 554    | VLPLV        | -              | -                               |
| 555    | VSVPE        | -              | -                               |
| 556    | LPAPIVR      | -              | -                               |
| 557    | KEMPFPK      | -              | -                               |
| 558    | SPRDVLVR     | -              | -                               |

| Number | Whey protein           | Casein protein | Whey protein and casein protein |
|--------|------------------------|----------------|---------------------------------|
| 559    | HKEMPFPK               | -              | -                               |
| 560    | SGDNVSVR               | -              | -                               |
| 561    | REVELEDQ               | -              | -                               |
| 562    | RGPFPILV               | -              | -                               |
| 563    | VSDDYVGR               | -              | -                               |
| 564    | TSSEIDRF               | -              | -                               |
| 565    | VRTPEVDKE              | -              | -                               |
| 566    | WGPLEPEGQ              | -              | -                               |
| 567    | TEEEKNRLN              | -              | -                               |
| 568    | GQSGKDPNHF             | -              | -                               |
| 569    | LTEEEKNRLN             | -              | -                               |
| 570    | VEELKPTPEGN            | -              | -                               |
| 571    | SGKDPNHFRPA            | -              | -                               |
| 572    | GNQELPREKYL            | -              | -                               |
| 573    | AEDPSQDIVER            | -              | -                               |
| 574    | LNPEDETHLE             | -              | -                               |
| 575    | TYPDSESPLTT            | -              | -                               |
| 576    | KGGYLPPEEIK            | -              | -                               |
| 577    | VLAPPQEELSK            | -              | -                               |
| 578    | EVDDTIQTLQQ            | -              | -                               |
| 579    | ELTDDKNQRFF            | -              | -                               |
| 580    | EDPSQDIVERN            | -              | -                               |
| 581    | SPFPVHPGTPE            | -              | -                               |
| 582    | RQPQNQNPKLPL           | -              | -                               |
| 583    | APPQEELSKSTL           | -              | -                               |
| 584    | GPGAPADPGRPA           | -              | -                               |
| 585    | AHLHTPMYFFISQ          | -              | -                               |
| 586    | ELKPTPEGNLEIL          | -              | -                               |
| 587    | VEELKPTPEGNLE          | -              | -                               |
| 588    | GLSPEVPNENLLR          | -              | -                               |
| 589    | QADVIGTETLERL          | -              | -                               |
| 590    | SPRQPQNQNPKLPL         | -              | -                               |
| 591    | RSPRQPQNQNPKLPL        | -              | -                               |
| 592    | ELDPAPNDEVDPGTR        | -              | -                               |
| 593    | VTYPKVQMLVNMFYVL       | -              | -                               |
| 594    | YLRSTNWDTRIAAGQAVEAIVK | -              | -                               |



Table S2 The pharmacokinetic properties and physicochemical properties of 105 peptides and IPI were further investigated by ADME evaluation

| Nu<br>m<br>b<br>e<br>r | Molecule | Canonical SMILES                                                        | For<br>m<br>u<br>l<br>a | MW  | #H<br>e<br>a<br>v<br>y<br>a<br>t<br>o<br>m<br>s | #Ar<br>o<br>m<br>a<br>t<br>i<br>c<br>h<br>e<br>a<br>v<br>y<br>a<br>t<br>o<br>m<br>s | F<br>r<br>a<br>c<br>t<br>i<br>o<br>n<br>a<br>b<br>l<br>e | #R<br>o<br>t<br>a<br>t<br>i<br>o<br>n<br>a<br>l<br>a<br>c<br>c<br>e<br>p<br>t<br>o<br>r<br>s | #H<br>-<br>b<br>o<br>n<br>d<br>s | #H<br>-<br>b<br>o<br>n<br>d<br>s | M<br>R | T<br>P<br>S<br>A | i<br>L<br>O<br>G<br>P | X<br>L<br>O<br>G<br>P | W<br>L<br>O<br>G<br>P | M<br>L<br>O<br>G<br>P | S<br>il<br>ic<br>o<br>n<br>s<br>e<br>n<br>s<br>i<br>t<br>i<br>v<br>e<br>n<br>e<br>s<br>s | C<br>o<br>n<br>s<br>e<br>n<br>s<br>i<br>t<br>i<br>v<br>e<br>n<br>e<br>s<br>s | ES<br>O<br>L<br>So<br>lu<br>bil<br>ity<br>(m<br>g/<br>ml<br>) | E<br>S<br>O<br>L<br>So<br>lu<br>bil<br>ity<br>(m<br>ol/<br>l) | E<br>S<br>O<br>L<br>C<br>l<br>a<br>s<br>s | A<br>l<br>i<br>S<br>o<br>l<br>u<br>b<br>i<br>l<br>i<br>t<br>y<br>(<br>m<br>g/<br>ml<br>) | Al<br>i<br>S<br>o<br>l<br>u<br>b<br>i<br>l<br>i<br>t<br>y<br>(<br>m<br>ol<br>/l) | Al<br>i<br>S<br>o<br>l<br>u<br>b<br>i<br>l<br>i<br>t<br>y<br>(<br>m<br>ol<br>/l) | Al<br>i<br>S<br>o<br>l<br>u<br>b<br>i<br>l<br>i<br>t<br>y<br>(<br>m<br>ol<br>/l) | Si<br>l<br>i<br>c<br>o<br>s<br>-<br>I<br>T<br>L<br>o<br>g<br>S<br>w | Sili<br>cos<br>-IT<br>Sol<br>ubi<br>lity<br>(m<br>g/<br>ml) | Sil<br>ico<br>s-IT<br>Sol<br>ubi<br>lity<br>(m<br>ol/l<br>) | Si<br>l<br>i<br>c<br>o<br>s<br>-<br>IT<br>cl<br>a<br>s<br>s | G<br>I<br>a<br>b<br>s<br>o<br>r<br>p<br>t<br>i<br>o<br>n | B<br>B<br>p<br>s<br>u<br>e<br>r<br>m<br>e<br>a<br>n<br>t | P<br>g<br>p<br>s<br>u<br>b<br>s<br>t<br>r<br>a<br>t<br>e | C<br>Y<br>P<br>1<br>A<br>2<br>i<br>n<br>h<br>i<br>b<br>i<br>t<br>o<br>r | C<br>Y<br>P<br>2<br>C<br>1<br>9<br>i<br>n<br>h<br>i<br>b<br>i<br>t<br>o<br>r | C<br>Y<br>P<br>2<br>C<br>9<br>i<br>n<br>h<br>i<br>b<br>i<br>t<br>o<br>r | C<br>Y<br>P<br>2<br>D<br>6<br>i<br>n<br>h<br>i<br>b<br>i<br>t<br>o<br>r | C<br>Y<br>P<br>3<br>A<br>4<br>i<br>n<br>h<br>i<br>b<br>i<br>t<br>o<br>r | l<br>o<br>g<br>K<br>p<br>(<br>c<br>m<br>/<br>s<br>) | Li<br>p<br>i<br>n<br>s<br>k<br>i<br>#<br>v<br>i<br>o<br>l<br>a<br>t<br>i<br>o<br>n<br>s | G<br>h<br>o<br>s<br>e<br>#<br>v<br>i<br>o<br>l<br>a<br>t<br>i<br>o<br>n<br>s | V<br>e<br>b<br>e<br>r<br>#<br>v<br>i<br>o<br>l<br>a<br>t<br>i<br>o<br>n<br>s | E<br>g<br>a<br>n<br>#<br>v<br>i<br>o<br>l<br>a<br>t<br>i<br>o<br>n<br>s | M<br>u<br>e<br>g<br>g<br>e<br>#<br>v<br>i<br>o<br>l<br>a<br>t<br>i<br>o<br>n<br>s | Bi<br>o<br>a<br>v<br>a<br>l<br>i<br>t<br>y<br>S<br>c<br>o<br>r<br>e | P<br>A<br>I<br>N<br>S<br>#<br>a<br>l<br>l<br>e<br>r<br>t<br>s | B<br>r<br>e<br>n<br>k<br>#<br>a<br>l<br>l<br>e<br>r<br>t<br>s | Le<br>a<br>d<br>l<br>i<br>k<br>e<br>n<br>e<br>s<br>s<br>#<br>v<br>i<br>o<br>l<br>a<br>t<br>i<br>o<br>n<br>s | Sy<br>n<br>t<br>h<br>e<br>t<br>i<br>c<br>A<br>c<br>c<br>e<br>s<br>s<br>i<br>b<br>i<br>l<br>i<br>t<br>y |                |                |                |                |                |                |                |                |                |                |                |                |                |                |                |                |                |                |                |                |                |                |                |                |                |                |                |                |                |                |                |                |                |                |                |                |                |                |                |                |                |                |                |                |                |                |                |                |                |                |                |                |                |                |                |                |                |                |                |                |                |                |                |                |                |                |                |                |                |                |                |                |                |                |                |                |                |                |                |                |                |                |                |                |                |                |                |                |                |                |                |                |                |                |                |                |                |                |                |                |                |                |                |                |                |                |                |                |                |                |                |                |                |                |                |                |                |                |                |                |                |                |                |                |                |                |                |                |                |                |                |                |                |                |                |                |                |                |                |                |                |                |                |                |                |                |                |                |                |                |                |                |                |                |                |                |                |                |                |                |                |                |                |                |                |                |                |                |                |                |                |                |                |                |                |                |                |                |                |                |                |                |                |                |                |                |                |                |                |                |                |                |                |                |                |                |                |                |                |                |                |                |                |                |                |                |                |                |                |                |                |                |                |                |                |                |                |                |                |                |                |                |                |                |                |                |                |                |                |                |                |                |                |                |                |                |                |                |                |                |                |                |                |                |                |                |                |                |                |                |                |                |                |                |                |                |                |                |                |                |                |                |                |                |                |                |                |                |                |                |                |                |                |                |                |                |                |                |                |                |                |                |                |                |                |                |                |                |                |                |                |                |                |                |                |                |                |                |                |                |                |                |                |                |                |                |                |                |                |                |                |                |                |                |                |                |                |                |                |                |                |                |                |                |                |                |                |                |                |                |                |                |                |                |                |                |                |                |                |                |                |                |                |                |                |                |                |                |                |                |                |                |                |                |                |                |                |                |                |                |                |                |                |                |                |                |                |                |                |                |                |                |                |                |                |                |                |                |                |                |                |                |                |                |                |                |                |                |                |                |                |                |                |                |                |                |                |                |                |                |                |                |                |                |                |                |                |                |                |                |                |                |                |                |                |                |                |                |                |                |                |                |                |                |                |                |                |                |                |                |                |                |                |                |                |                |                |                |                |                |                |                |                |                |                |                |                |                |                |                |                |                |                |                |                |                |                |                |                |                |                |                |                |                |                |                |                |                |                |                |                |                |                |                |                |                |                |                |                |                |                |                |                |                |                |                |                |                |                |                |                |                |                |                |                |                |                |                |                |                |                |                |                |                |                |                |                |                |                |                |                |                |                |                |                |                |                |                |                |                |                |                |                |                |                |                |                |                |                |                |                |                |                |                |                |                |                |                |                |                |                |                |                |                |                |                |                |                |                |                |                |                |                |                |                |                |                |                |                |                |                |                |                |                |                |                |                |                |                |                |                |                |                |                |                |                |                |                |        |
|------------------------|----------|-------------------------------------------------------------------------|-------------------------|-----|-------------------------------------------------|-------------------------------------------------------------------------------------|----------------------------------------------------------|----------------------------------------------------------------------------------------------|----------------------------------|----------------------------------|--------|------------------|-----------------------|-----------------------|-----------------------|-----------------------|------------------------------------------------------------------------------------------|------------------------------------------------------------------------------|---------------------------------------------------------------|---------------------------------------------------------------|-------------------------------------------|------------------------------------------------------------------------------------------|----------------------------------------------------------------------------------|----------------------------------------------------------------------------------|----------------------------------------------------------------------------------|---------------------------------------------------------------------|-------------------------------------------------------------|-------------------------------------------------------------|-------------------------------------------------------------|----------------------------------------------------------|----------------------------------------------------------|----------------------------------------------------------|-------------------------------------------------------------------------|------------------------------------------------------------------------------|-------------------------------------------------------------------------|-------------------------------------------------------------------------|-------------------------------------------------------------------------|-----------------------------------------------------|-----------------------------------------------------------------------------------------|------------------------------------------------------------------------------|------------------------------------------------------------------------------|-------------------------------------------------------------------------|-----------------------------------------------------------------------------------|---------------------------------------------------------------------|---------------------------------------------------------------|---------------------------------------------------------------|-------------------------------------------------------------------------------------------------------------|--------------------------------------------------------------------------------------------------------|----------------|----------------|----------------|----------------|----------------|----------------|----------------|----------------|----------------|----------------|----------------|----------------|----------------|----------------|----------------|----------------|----------------|----------------|----------------|----------------|----------------|----------------|----------------|----------------|----------------|----------------|----------------|----------------|----------------|----------------|----------------|----------------|----------------|----------------|----------------|----------------|----------------|----------------|----------------|----------------|----------------|----------------|----------------|----------------|----------------|----------------|----------------|----------------|----------------|----------------|----------------|----------------|----------------|----------------|----------------|----------------|----------------|----------------|----------------|----------------|----------------|----------------|----------------|----------------|----------------|----------------|----------------|----------------|----------------|----------------|----------------|----------------|----------------|----------------|----------------|----------------|----------------|----------------|----------------|----------------|----------------|----------------|----------------|----------------|----------------|----------------|----------------|----------------|----------------|----------------|----------------|----------------|----------------|----------------|----------------|----------------|----------------|----------------|----------------|----------------|----------------|----------------|----------------|----------------|----------------|----------------|----------------|----------------|----------------|----------------|----------------|----------------|----------------|----------------|----------------|----------------|----------------|----------------|----------------|----------------|----------------|----------------|----------------|----------------|----------------|----------------|----------------|----------------|----------------|----------------|----------------|----------------|----------------|----------------|----------------|----------------|----------------|----------------|----------------|----------------|----------------|----------------|----------------|----------------|----------------|----------------|----------------|----------------|----------------|----------------|----------------|----------------|----------------|----------------|----------------|----------------|----------------|----------------|----------------|----------------|----------------|----------------|----------------|----------------|----------------|----------------|----------------|----------------|----------------|----------------|----------------|----------------|----------------|----------------|----------------|----------------|----------------|----------------|----------------|----------------|----------------|----------------|----------------|----------------|----------------|----------------|----------------|----------------|----------------|----------------|----------------|----------------|----------------|----------------|----------------|----------------|----------------|----------------|----------------|----------------|----------------|----------------|----------------|----------------|----------------|----------------|----------------|----------------|----------------|----------------|----------------|----------------|----------------|----------------|----------------|----------------|----------------|----------------|----------------|----------------|----------------|----------------|----------------|----------------|----------------|----------------|----------------|----------------|----------------|----------------|----------------|----------------|----------------|----------------|----------------|----------------|----------------|----------------|----------------|----------------|----------------|----------------|----------------|----------------|----------------|----------------|----------------|----------------|----------------|----------------|----------------|----------------|----------------|----------------|----------------|----------------|----------------|----------------|----------------|----------------|----------------|----------------|----------------|----------------|----------------|----------------|----------------|----------------|----------------|----------------|----------------|----------------|----------------|----------------|----------------|----------------|----------------|----------------|----------------|----------------|----------------|----------------|----------------|----------------|----------------|----------------|----------------|----------------|----------------|----------------|----------------|----------------|----------------|----------------|----------------|----------------|----------------|----------------|----------------|----------------|----------------|----------------|----------------|----------------|----------------|----------------|----------------|----------------|----------------|----------------|----------------|----------------|----------------|----------------|----------------|----------------|----------------|----------------|----------------|----------------|----------------|----------------|----------------|----------------|----------------|----------------|----------------|----------------|----------------|----------------|----------------|----------------|----------------|----------------|----------------|----------------|----------------|----------------|----------------|----------------|----------------|----------------|----------------|----------------|----------------|----------------|----------------|----------------|----------------|----------------|----------------|----------------|----------------|----------------|----------------|----------------|----------------|----------------|----------------|----------------|----------------|----------------|----------------|----------------|----------------|----------------|----------------|----------------|----------------|----------------|----------------|----------------|----------------|----------------|----------------|----------------|----------------|----------------|----------------|----------------|----------------|----------------|----------------|----------------|----------------|----------------|----------------|----------------|----------------|----------------|----------------|----------------|----------------|----------------|----------------|----------------|----------------|----------------|----------------|----------------|----------------|----------------|----------------|----------------|----------------|----------------|----------------|----------------|----------------|----------------|----------------|----------------|----------------|----------------|----------------|----------------|----------------|----------------|----------------|----------------|----------------|----------------|----------------|----------------|----------------|----------------|----------------|----------------|----------------|----------------|----------------|----------------|----------------|----------------|----------------|----------------|----------------|----------------|----------------|----------------|----------------|----------------|----------------|----------------|----------------|----------------|----------------|----------------|----------------|----------------|----------------|----------------|----------------|----------------|----------------|----------------|----------------|----------------|----------------|----------------|----------------|----------------|----------------|----------------|----------------|----------------|----------------|----------------|----------------|----------------|----------------|----------------|----------------|----------------|----------------|----------------|----------------|----------------|----------------|----------------|----------------|----------------|----------------|----------------|----------------|----------------|----------------|----------------|----------------|----------------|----------------|----------------|----------------|----------------|----------------|----------------|----------------|----------------|----------------|----------------|----------------|----------------|----------------|----------------|----------------|----------------|----------------|----------------|----------------|----------------|----------------|----------------|----------------|----------------|----------------|----------------|----------------|----------------|----------------|----------------|----------------|----------------|----------------|----------------|----------------|----------------|----------------|----------------|----------------|----------------|----------------|----------------|----------------|----------------|----------------|----------------|----------------|----------------|----------------|----------------|----------------|----------------|----------------|----------------|----------------|----------------|----------------|----------------|----------------|----------------|----------------|----------------|----------------|----------------|----------------|----------------|----------------|----------------|----------------|----------------|----------------|----------------|----------------|----------------|----------------|----------------|----------------|----------------|----------------|----------------|----------------|----------------|----------------|----------------|----------------|----------------|----------------|----------------|--------|
| 1                      | FRPD     | NC(=N)CCCC[C@@H](C(=O)N1CCC[C@H](C(=O)O)CC(=O)O)NC(=O)[C@H](Cc1ccccc1)N | C24H35N7O7              | 538 | 36                                              | 0.185                                                                               | 1                                                        | 9                                                                                            | 8                                | 13                               | 24     | 19               | 10                    | -5.21                 | -5.21                 | -5.03                 | -5.03                                                                                    | -1.64                                                                        | 68.9                                                          | 12.9                                                          | Highly soluble                            | 0.23                                                                                     | 4.34                                                                             | Highly soluble                                                                   | 0.23                                                                             | 4.34                                                                | Highly soluble                                              | Highly soluble                                              | Highly soluble                                              | Highly soluble                                           | Highly soluble                                           | Highly soluble                                           | Highly soluble                                                          | Highly soluble                                                               | Highly soluble                                                          | Highly soluble                                                          | Highly soluble                                                          | Highly soluble                                      | Highly soluble                                                                          | Highly soluble                                                               | Highly soluble                                                               | Highly soluble                                                          | Highly soluble                                                                    | Highly soluble                                                      | Highly soluble                                                | Highly soluble                                                | Highly soluble                                                                                              | Highly soluble                                                                                         | Highly soluble | Highly soluble | Highly soluble | Highly soluble | Highly soluble | Highly soluble | Highly soluble | Highly soluble | Highly soluble | Highly soluble | Highly soluble | Highly soluble | Highly soluble | Highly soluble | Highly soluble | Highly soluble | Highly soluble | Highly soluble | Highly soluble | Highly soluble | Highly soluble | Highly soluble | Highly soluble | Highly soluble | Highly soluble | Highly soluble | Highly soluble | Highly soluble | Highly soluble | Highly soluble | Highly soluble | Highly soluble | Highly soluble | Highly soluble | Highly soluble | Highly soluble | Highly soluble | Highly soluble | Highly soluble | Highly soluble | Highly soluble | Highly soluble | Highly soluble | Highly soluble | Highly soluble | Highly soluble | Highly soluble | Highly soluble | Highly soluble | Highly soluble | Highly soluble | Highly soluble | Highly soluble | Highly soluble | Highly soluble | Highly soluble | Highly soluble | Highly soluble | Highly soluble | Highly soluble | Highly soluble | Highly soluble | Highly soluble | Highly soluble | Highly soluble | Highly soluble | Highly soluble | Highly soluble | Highly soluble | Highly soluble | Highly soluble | Highly soluble | Highly soluble | Highly soluble | Highly soluble | Highly soluble | Highly soluble | Highly soluble | Highly soluble | Highly soluble | Highly soluble | Highly soluble | Highly soluble | Highly soluble | Highly soluble | Highly soluble | Highly soluble | Highly soluble | Highly soluble | Highly soluble | Highly soluble | Highly soluble | Highly soluble | Highly soluble | Highly soluble | Highly soluble | Highly soluble | Highly soluble | Highly soluble | Highly soluble | Highly soluble | Highly soluble | Highly soluble | Highly soluble | Highly soluble | Highly soluble | Highly soluble | Highly soluble | Highly soluble | Highly soluble | Highly soluble | Highly soluble | Highly soluble | Highly soluble | Highly soluble | Highly soluble | Highly soluble | Highly soluble | Highly soluble | Highly soluble | Highly soluble | Highly soluble | Highly soluble | Highly soluble | Highly soluble | Highly soluble | Highly soluble | Highly soluble | Highly soluble | Highly soluble | Highly soluble | Highly soluble | Highly soluble | Highly soluble | Highly soluble | Highly soluble | Highly soluble | Highly soluble | Highly soluble | Highly soluble | Highly soluble | Highly soluble | Highly soluble | Highly soluble | Highly soluble | Highly soluble | Highly soluble | Highly soluble | Highly soluble | Highly soluble | Highly soluble | Highly soluble | Highly soluble | Highly soluble | Highly soluble | Highly soluble | Highly soluble | Highly soluble | Highly soluble | Highly soluble | Highly soluble | Highly soluble | Highly soluble | Highly soluble | Highly soluble | Highly soluble | Highly soluble | Highly soluble | Highly soluble | Highly soluble | Highly soluble | Highly soluble | Highly soluble | Highly soluble | Highly soluble | Highly soluble | Highly soluble | Highly soluble | Highly soluble | Highly soluble | Highly soluble | Highly soluble | Highly soluble | Highly soluble | Highly soluble | Highly soluble | Highly soluble | Highly soluble | Highly soluble | Highly soluble | Highly soluble | Highly soluble | Highly soluble | Highly soluble | Highly soluble | Highly soluble | Highly soluble | Highly soluble | Highly soluble | Highly soluble | Highly soluble | Highly soluble | Highly soluble | Highly soluble | Highly soluble | Highly soluble | Highly soluble | Highly soluble | Highly soluble | Highly soluble | Highly soluble | Highly soluble | Highly soluble | Highly soluble | Highly soluble | Highly soluble | Highly soluble | Highly soluble | Highly soluble | Highly soluble | Highly soluble | Highly soluble | Highly soluble | Highly soluble | Highly soluble | Highly soluble | Highly soluble | Highly soluble | Highly soluble | Highly soluble | Highly soluble | Highly soluble | Highly soluble | Highly soluble | Highly soluble | Highly soluble | Highly soluble | Highly soluble | Highly soluble | Highly soluble | Highly soluble | Highly soluble | Highly soluble | Highly soluble | Highly soluble | Highly soluble | Highly soluble | Highly soluble | Highly soluble | Highly soluble | Highly soluble | Highly soluble | Highly soluble | Highly soluble | Highly soluble | Highly soluble | Highly soluble | Highly soluble | Highly soluble | Highly soluble | Highly soluble | Highly soluble | Highly soluble | Highly soluble | Highly soluble | Highly soluble | Highly soluble | Highly soluble | Highly soluble | Highly soluble | Highly soluble | Highly soluble | Highly soluble | Highly soluble | Highly soluble | Highly soluble | Highly soluble | Highly soluble | Highly soluble | Highly soluble | Highly soluble | Highly soluble | Highly soluble | Highly soluble | Highly soluble | Highly soluble | Highly soluble | Highly soluble | Highly soluble | Highly soluble | Highly soluble | Highly soluble | Highly soluble | Highly soluble | Highly soluble | Highly soluble | Highly soluble | Highly soluble | Highly soluble | Highly soluble | Highly soluble | Highly soluble | Highly soluble | Highly soluble | Highly soluble | Highly soluble | Highly soluble | Highly soluble | Highly soluble | Highly soluble | Highly soluble | Highly soluble | Highly soluble | Highly soluble | Highly soluble | Highly soluble | Highly soluble | Highly soluble | Highly soluble | Highly soluble | Highly soluble | Highly soluble | Highly soluble | Highly soluble | Highly soluble | Highly soluble | Highly soluble | Highly soluble | Highly soluble | Highly soluble | Highly soluble | Highly soluble | Highly soluble | Highly soluble | Highly soluble | Highly soluble | Highly soluble | Highly soluble | Highly soluble | Highly soluble | Highly soluble | Highly soluble | Highly soluble | Highly soluble | Highly soluble | Highly soluble | Highly soluble | Highly soluble | Highly soluble | Highly soluble | Highly soluble | Highly soluble | Highly soluble | Highly soluble | Highly soluble | Highly soluble | Highly soluble | Highly soluble | Highly soluble | Highly soluble | Highly soluble | Highly soluble | Highly soluble | Highly soluble | Highly soluble | Highly soluble | Highly soluble | Highly soluble | Highly soluble | Highly soluble | Highly soluble | Highly soluble | Highly soluble | Highly soluble | Highly soluble | Highly soluble | Highly soluble | Highly soluble | Highly soluble | Highly soluble | Highly soluble | Highly soluble | Highly soluble | Highly soluble | Highly soluble | Highly soluble | Highly soluble | Highly soluble | Highly soluble | Highly soluble | Highly soluble | Highly soluble | Highly soluble | Highly soluble | Highly soluble | Highly soluble | Highly soluble | Highly soluble | Highly soluble | Highly soluble | Highly soluble | Highly soluble | Highly soluble | Highly soluble | Highly soluble | Highly soluble | Highly soluble | Highly soluble | Highly soluble | Highly soluble | Highly soluble | Highly soluble | Highly soluble | Highly soluble | Highly soluble | Highly soluble | Highly soluble | Highly soluble | Highly soluble | Highly soluble | Highly soluble | Highly soluble | Highly soluble | Highly soluble | Highly soluble | Highly soluble | Highly soluble | Highly soluble | Highly soluble | Highly soluble | Highly soluble | Highly soluble | Highly soluble | Highly soluble | Highly soluble | Highly soluble | Highly soluble | Highly soluble | Highly soluble | Highly soluble | Highly soluble | Highly soluble | Highly soluble | Highly soluble | Highly soluble | Highly soluble | Highly soluble | Highly soluble | Highly soluble | Highly soluble | Highly soluble | Highly soluble | Highly soluble | Highly soluble | Highly soluble | Highly soluble | Highly soluble | Highly soluble | Highly soluble | Highly soluble | Highly soluble | Highly soluble | Highly soluble | Highly soluble | Highly soluble | Highly soluble | Highly soluble | Highly soluble | Highly soluble | Highly soluble | Highly soluble | Highly soluble | Highly soluble | Highly soluble | Highly soluble | Highly soluble | Highly soluble | Highly soluble | Highly soluble | Highly soluble | Highly soluble | Highly soluble | Highly soluble | Highly soluble | Highly soluble | Highly soluble | Highly soluble | Highly soluble | Highly soluble | Highly soluble | Highly soluble | Highly soluble | Highly soluble | Highly soluble | Highly soluble | Highly soluble | Highly soluble | Highly soluble | Highly soluble | Highly soluble | Highly soluble | Highly soluble | Highly soluble | Highly soluble | Highly soluble | Highly soluble | Highly soluble | Highly soluble | Highly soluble | Highly soluble | Highly soluble | Highly soluble | Highly soluble | Highly soluble | Highly soluble | Highly soluble | Highly soluble | Highly soluble | Highly soluble | Highly soluble | Highly soluble | Highly soluble | Highly soluble | Highly soluble | Highly soluble | Highly soluble | Highly soluble | Highly soluble | Highly soluble | Highly soluble | Highly soluble | Highly soluble | Highly soluble | Highly soluble | Highly soluble | Highly soluble | Highly soluble | Highly soluble | Highly soluble | Highly soluble | Highly soluble | Highly soluble | Highly soluble | Highly soluble | Highly soluble | Highly soluble | Highly soluble | Highly soluble | Highly soluble | Highly soluble | Highly soluble | Highly soluble | Highly soluble | Highly soluble | Highly soluble | Highly soluble | Highly soluble | Highly soluble | Highly soluble | Highly soluble | Highly soluble | Highly soluble | Highly soluble | Highly soluble | Highly soluble | Highly soluble | Highly soluble | Highly soluble | Highly soluble | Highly soluble | Highly soluble | Highly soluble | Highly soluble | Highly soluble | Highly soluble | Highly soluble | Highly soluble | Highly soluble | Highly |









|    |      |                                                                            |            |     |   |     |   |   |       |        |       |         |       |       |        |       |       |       |                |              |      |        |                |            |        |        |         |                  |   |   |   |   |   |   |   |        |       |   |   |   |   |      |    |   |   |      |  |    |
|----|------|----------------------------------------------------------------------------|------------|-----|---|-----|---|---|-------|--------|-------|---------|-------|-------|--------|-------|-------|-------|----------------|--------------|------|--------|----------------|------------|--------|--------|---------|------------------|---|---|---|---|---|---|---|--------|-------|---|---|---|---|------|----|---|---|------|--|----|
| 9  | RQ   | H](C(=O)N[C@H](C(=O)O)CCC(=O)N)NC(=O)[C@H](Cc1c[nH]c2c1cccc2)N             | 2232N8O5   | 885 |   | .41 | 7 |   |       | 28.235 | 42.81 | .48     | 39186 | 136   | 02     | 1.29  | .53   | 40    | 36             | ighlysoluble | 0.58 | 8      | 262            | erysoluble | 4.08   | 403    | 000824  | oderatelysoluble | o | o | o | o | o | o | o | o      | 12.06 |   |   |   |   |      | 17 |   |   |      |  | 29 |
| 20 | APAY | Oc1ccc(cc1)C[C@@H](C(=O)O)NC(=O)[C@@H](NC(=O)[C@@H]1CCCN1C(=O)[C@@H](N)C)C | C20H24N4O6 | 436 | 0 | 1   | 7 | 5 | 111   | 16.21  | 18.16 | -2.83   | -1082 | 0.01  | -0.54  | -0.18 | 278   | 0.66  | Verysoluble    | -0.17        | 28   | 0.671  | Verysoluble    | -2.23      | 2.47   | 0.0587 | Soluble | L                | N | N | N | N | N | N | N | -10.77 | 0     | 1 | 2 | 1 | 2 | 0.55 | 0  | 0 | 2 | 3.75 |  |    |
| 21 | FTR  | NC(=N)NCCC[C@@H](C(=O)O)NC(=O)[C@H]([C@H](O)C)NC(=O)[C@H](Cc1cccc1)N       | C19H23N6O5 | 436 | 0 | 1   | 7 | 8 | 10984 | 203745 | 0.47  | -107958 | -4178 | -0.58 | -1.396 | 0     | 3850  | 9.11  | Hightlysoluble | 0.42         | 1100 | 2.61   | Hightlysoluble | -2.73      | 0.792  | 0.0187 | Soluble | L                | N | Y | N | N | N | N | N | -11.78 | 2     | 1 | 2 | 1 | 3 | 0.17 | 0  | 2 | 2 | 4.05 |  |    |
| 22 | WDL  | CC(C[C@@H](C(=O)O)NC(=O)[C@@H](NC(=O)[C@H](Cc1c[nH]c2c1cccc2)N)CC(=O)O)C   | C21H24N4O6 | 439 | 0 | 1   | 7 | 6 | 11322 | 17461  | 1.29  | -0.65   | 1.35  | 0.54  | 0.271  | -0.8  | 83194 | 0.194 | Verysoluble    | -1.3         | 21.8 | 0.0503 | Verysoluble    | -3.75      | 0.0773 | 0.0179 | Soluble | L                | N | N | N | N | N | N | N | -10.25 | 1     | 0 | 2 | 1 | 2 | 0.11 | 0  | 0 | 2 | 3.96 |  |    |

































|    |     |                                                                             |             |       |    |      |      |    |   |         |        |        |          |       |      |      |       |      |         |              |       |      |         |              |       |         |                    |                    |      |    |     |    |    |    |    |    |        |       |   |   |   |      |      |      |   |      |      |      |
|----|-----|-----------------------------------------------------------------------------|-------------|-------|----|------|------|----|---|---------|--------|--------|----------|-------|------|------|-------|------|---------|--------------|-------|------|---------|--------------|-------|---------|--------------------|--------------------|------|----|-----|----|----|----|----|----|--------|-------|---|---|---|------|------|------|---|------|------|------|
| 79 | WTL | CC(C[C@@H](C(=O)O)NC(=O)[C@H]([C@H](O)C)NC(=O)[C@H](Cc1c[nH]c2c1ccc2)N)C    | C211830N4O5 | 41849 | 30 | 9    | 0.48 | 12 | 6 | 6       | 112559 | 112754 | 11276231 | -1.52 | 0.83 | 1.03 | 0.86  | 58.2 | 0.139   | Very soluble | -1.2  | 26.5 | 0.0632  | Very soluble | -3.84 | 0.0599  | 0.00143            | Soluble            | Low  | No | Yes | No | No | No | No | No | No     | -9.99 | 1 | 0 | 2 | 1    | 2    | 0.55 | 0 | 0    | 2    | 4.01 |
| 80 | LYL | Oc1ccc(cc1)C[C@@H](C(=O)N[C@H](C(=O)O)CC(C)C)NC(=O)[C@H](CC(C)C)N           | C211733N3O5 | 4209  | 6  | 0.57 | 13   | 6  | 5 | 1112215 | 114106 | 2.105  | -1.431   | 1.11  | 2.05 | 1.06 | -0.82 | 62   | 0.152   | Very soluble | -1.14 | 29.7 | 0.0729  | Very soluble | -3.76 | 0.0708  | 0.00174            | Soluble            | High | No | Yes | No | No | No | No | No | -9.74  | 0     | 0 | 2 | 1 | 0    | 0.55 | 0    | 0 | 2    | 3.74 |      |
| 81 | WVY | Oc1ccc(cc1)C[C@@H](C(=O)O)NC(=O)[C@H](C(C)C)NC(=O)[C@H](Cc1c[nH]c2c1cccc2)N | C25630N4O5  | 434   | 15 | 0.32 | 12   | 6  | 6 | 128333  | 125754 | 2.842  | -1.72    | 0.58  | 2.12 | 1.04 | -2.48 | 4.64 | 0.00995 | Soluble      | -2.42 | 1.76 | 0.00377 | Soluble      | -5.88 | 0.00618 | 0.00132            | Moderately soluble | Low  | No | Yes | No | No | No | No | No | -9.44  | 1     | 0 | 2 | 1 | 2    | 0.55 | 0    | 0 | 2    | 4.02 |      |
| 82 | FSW | OC[C@@H](C(=O)N[C@H](C(=O)O)Cc1c[nH]c2c1cccc2)NC(=O)[C@H](Cc1ccccc1)N       | C23826N4O5  | 432   | 15 | 0.26 | 12   | 6  | 6 | 117854  | 117794 | 2.709  | -2.39    | 0.031 | 2.03 | 0.45 | -0.8  | 70   | 0.16    | Very soluble | -0.69 | 89.4 | 0.204   | Very soluble | -5.49 | 0.0143  | 0.00325            | Moderately soluble | Low  | No | No  | No | No | No | No | No | -10.46 | 1     | 0 | 2 | 1 | 3    | 0.55 | 0    | 0 | 2    | 3.83 |      |
| 83 | WS  | OC[C@@H](C(=O)N[C@H](C(=O)O)Cc1c[nH]c2c1cccc2)N                             | C232        | 432   | 15 | 0.2  | 12   | 6  | 6 | 1150    | 1150   | 0.2    | -0.2     | 2.0   | 0.1  | -0.0 | 70    | 0.16 | Ver     | -0.4         | 89.20 | 0.20 | Ver     | -5.01        | 0.00  | 0.00    | Moderately soluble | Low                | No   | No | No  | No | No | No | No | -1 | 1      | 0     | 2 | 1 | 3 | 0.55 | 0    | 0    | 2 | 3.83 |      |      |
